# Supplementary material for: A Role for the Nonsense-Mediated mRNA Decay Pathway in Maintaining Genome Stability in Caenorhabditis elegans
Source: PubMed Central journal article supplement (PMC5560793; doi:10.1534/genetics.117.203414), 2017-06-20

# FIGURE S1

## A

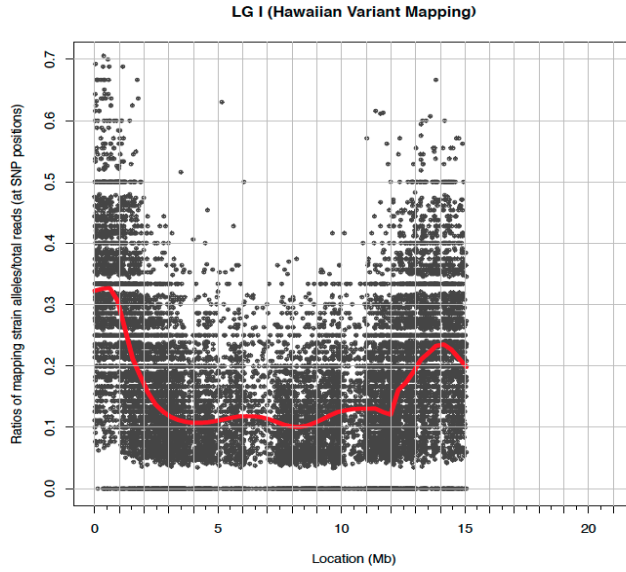

| # | Chr | Position | Refer | Change | Change | Homoz | Quality | Coverage | Gene_name | Bio_type     | Effect                 | old_AA/new_AA | Old_codon/New_codon |
|---|-----|----------|-------|--------|--------|-------|---------|----------|-----------|--------------|------------------------|---------------|---------------------|
| 1 |     | 2379644  | C     | T      | SNP    | Hom   | 435.13  | 12       | sydn-1    | protein_codi | NON_SYNONYMOUS_CODING  | M/I           | atG/atA             |
| 1 |     | 5042625  | *     | #NAME? | DEL    | Hom   | 424.9   | 10       | C46H11.7  | protein_codi | CODON_DELETION         | T/-           | acc/-               |
| 1 |     | 6627884  | C     | T      | SNP    | Hom   | 473.86  | 13       | D2092.10  | protein_codi | NON_SYNONYMOUS_CODING  | S/N           | aGt/aAt             |
| 1 |     | 6801829  | *     | #NAME? | INS    | Hom   | 689.09  | 13       | E0ZD9.1   | protein_codi | SPLICE_SITE_ACCEPTOR   |               |                     |
| 1 |     | 6903858  | C     | T      | SNP    | Hom   | 664.99  | 19       | smg-1     | protein_codi | NON_SYNONYMOUS_CODING  | D/N           | Gat/Aat             |
| 1 |     | 6903858  | C     | T      | SNP    | Hom   | 664.99  | 19       | smg-1     | protein_codi | NON_SYNONYMOUS_CODING  | D/N           | Gat/Aat             |
| 1 |     | 7301404  | C     | G      | SNP    | Hom   | 732.53  | 20       | ttx-7     | protein_codi | NON_SYNONYMOUS_CODING  | G/A           | gGc/gCc             |
| 1 |     | 7301404  | C     | G      | SNP    | Hom   | 732.53  | 20       | ttx-7     | protein_codi | NON_SYNONYMOUS_CODING  | G/A           | gGc/gCc             |
| 1 |     | 10113280 | *     | #NAME? | DEL    | Hom   | 1004.58 | 27       | Y106G6D.3 | protein_codi | FRAME_SHIFT: Y106G6D.3 |               |                     |
| 1 |     | 11145688 | *     | #NAME? | INS    | Hom   | 582.05  | 14       | ZK39.9    | protein_codi | FRAME_SHIFT: ZK39.9    |               |                     |
| 1 |     | 13101700 | *     | #NAME? | DEL    | Hom   | 230.37  | 12       | Y26D4A.21 | protein_codi | FRAME_SHIFT: Y26D4A.21 |               |                     |
| 1 |     | 14349946 | *     | +C     | INS    | Hom   | 902.92  | 21       | Y105E8A.2 | protein_codi | SPLICE_SITE_DONOR      |               |                     |

## B

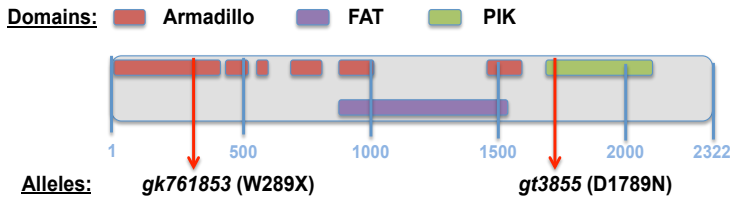

Supplement: 1853FigureS1.pdf [file 1853FigureS1.pdf]
