# Supplementary material for: A Role for the Nonsense-Mediated mRNA Decay Pathway in Maintaining Genome Stability in Caenorhabditis elegans
Source: PubMed Central journal article supplement (PMC5560793; doi:10.1534/genetics.117.203414), 2017-06-20

FIGURE S4

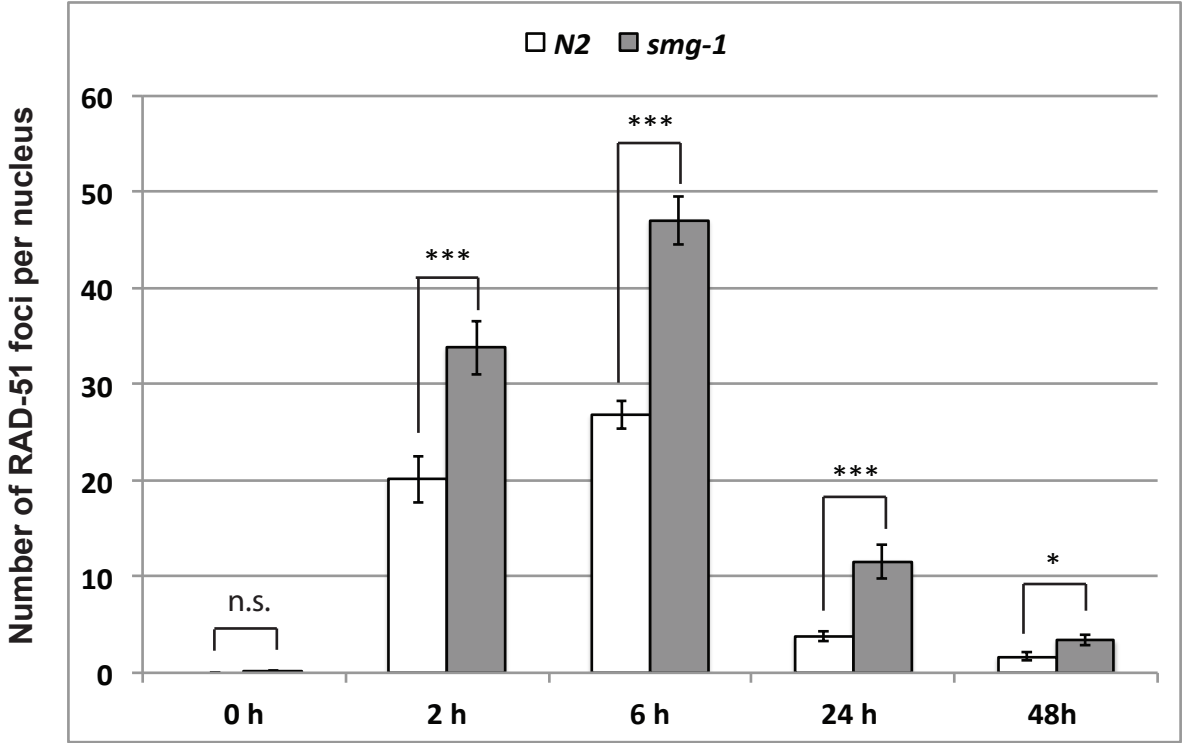

Supplement: 1853FigureS4.pdf [file 1853FigureS4.pdf]
