# Supplementary material for: A Role for the Nonsense-Mediated mRNA Decay Pathway in Maintaining Genome Stability in Caenorhabditis elegans
Source: PubMed Central journal article supplement (PMC5560793; doi:10.1534/genetics.117.203414), 2017-06-20

FIGURE S5

A

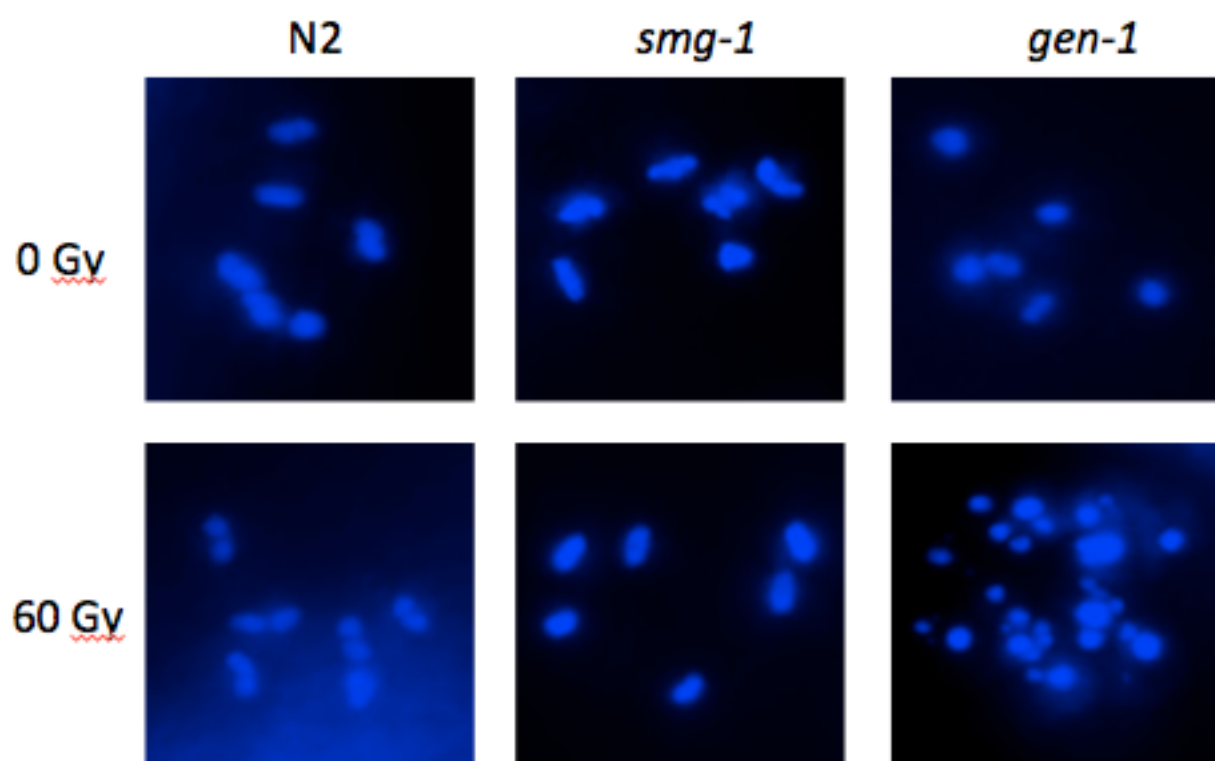

B

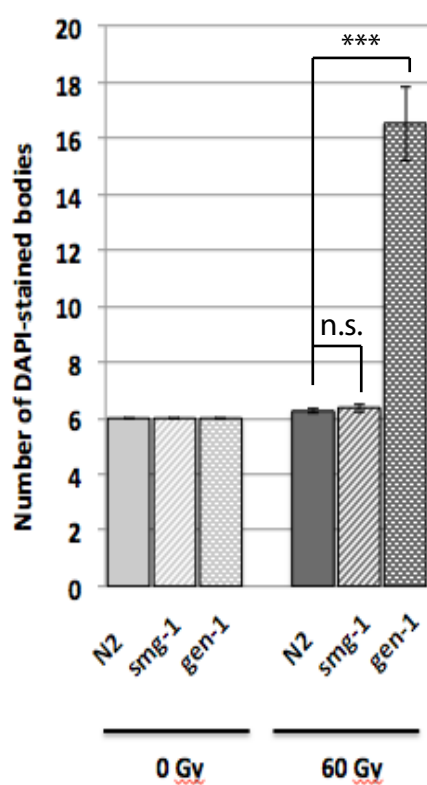

Supplement: 1853FigureS5.pdf [file 1853FigureS5.pdf]
