# Supplementary material for: A Role for the Nonsense-Mediated mRNA Decay Pathway in Maintaining Genome Stability in Caenorhabditis elegans
Source: PubMed Central journal article supplement (PMC5560793; doi:10.1534/genetics.117.203414), 2017-06-20
Supplement: 1853TableS1.pdf [file 1853TableS1.pdf]

# Supplementary material

## TABLE S1

| Strain code | Genotype                                       |
|-------------|------------------------------------------------|
| TG1813      | <i>N2 wt (Bristol)</i>                         |
| CB4856      | <i>wt (Hawaiian)</i>                           |
| VC40686     | <i>smg-1 (gk761853) I</i>                      |
| TR1331      | <i>smg-1 (r861) I</i>                          |
| TG3855      | <i>smg-1 (tg3855) I</i>                        |
| VC40212     | <i>smg-5 (r860) I</i>                          |
| TG1660      | <i>xpf-1 (tm2842) II</i>                       |
| TR2264      | <i>smg-6 (ok1794) III</i>                      |
| DW102       | <i>brc-1 (tm1145) III</i>                      |
| RB873       | <i>lig-4 (ok716) III</i>                       |
| TG2534      | <i>polq-1 (tm2026) III</i>                     |
| RB2422      | <i>polh-1 (ok3317) III</i>                     |
| TG1540      | <i>gen-1 (tm2940) III</i>                      |
| TG4211      | <i>smg-1 (gk761853) I; brc-1 (tm1145) III</i>  |
| TG4212      | <i>smg-1 (gk761853) I; lig-4 (ok716) III</i>   |
| TG4213      | <i>smg-1 (gk761853) I; polq-1 (tm2026) III</i> |
| VC40827     | <i>smg-1 (r904) I; unc-54 (r293) I</i>         |
| TR1417      | <i>smg-2 (r908) I; unc-54 (r293) I</i>         |
| TR1335      | <i>smg-5 (r860) I; unc-54 (r293) I</i>         |
| TR1421      | <i>unc-54 (r293) I; smg-3 (r930) IV</i>        |
| TR1696      | <i>unc-54 (r293) I; smg-4 (r1169) V</i>        |
| TR1324      | <i>unc-54 (r293) I; smg-6 (r1217) III</i>      |
| TR2230      | <i>unc-54 (r293) I; smg-7 (r1197) IV</i>       |
